# Supplementary material
Source: PubMed Central journal article supplement (PMC9547831)

E1a.

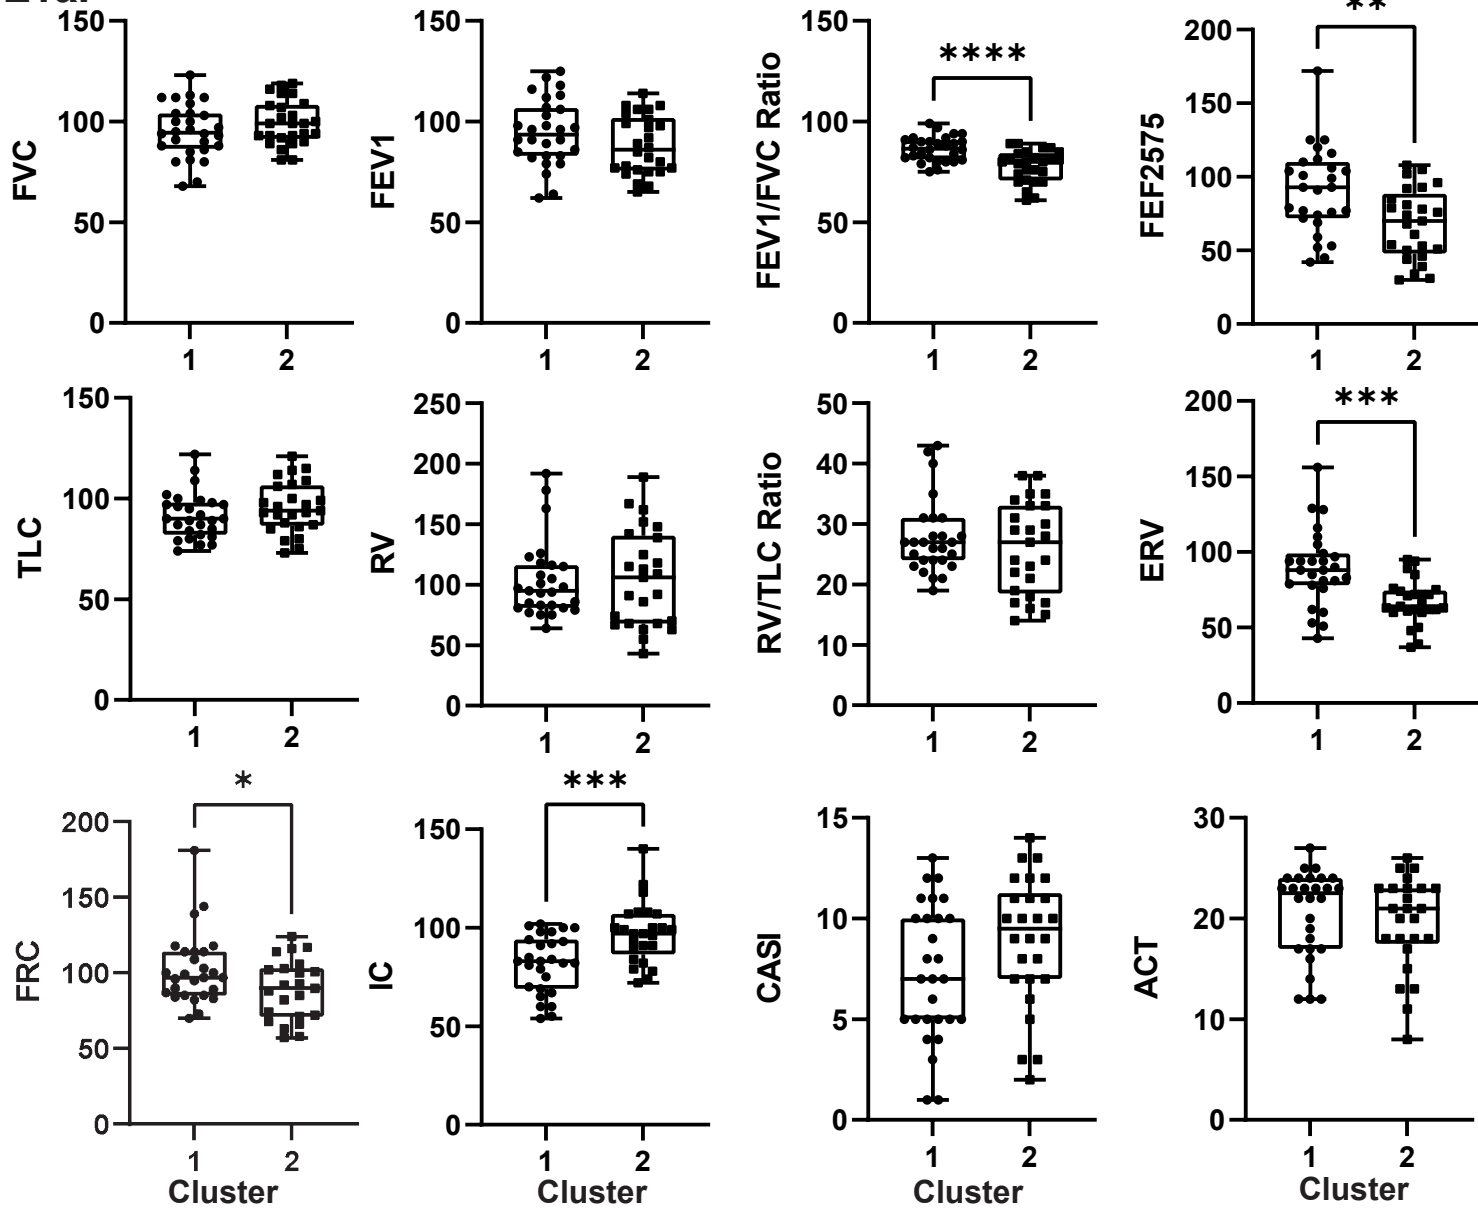

**E1b.**

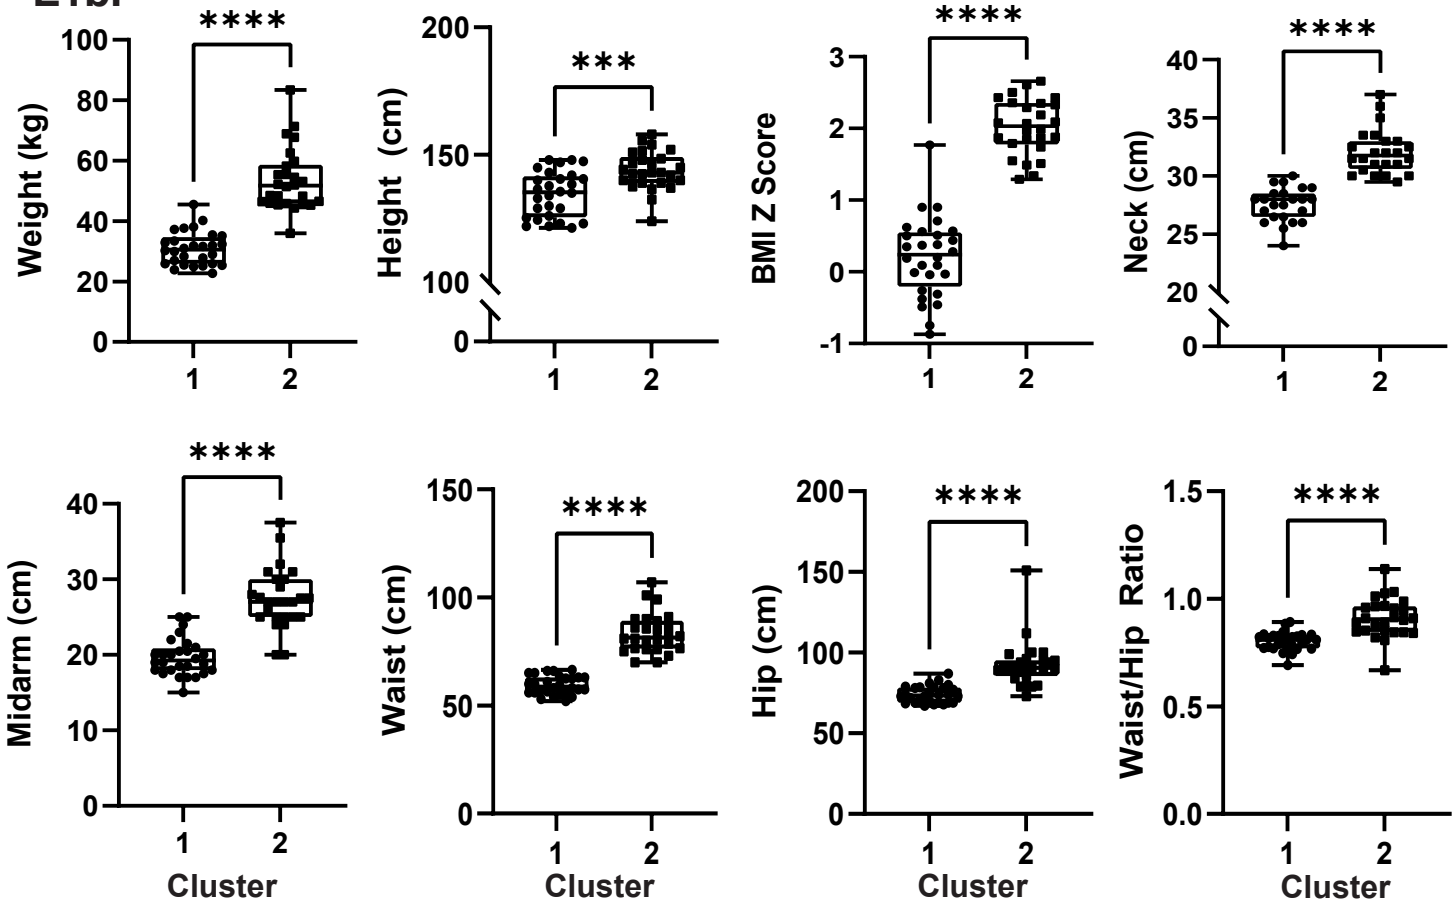

**E1c.**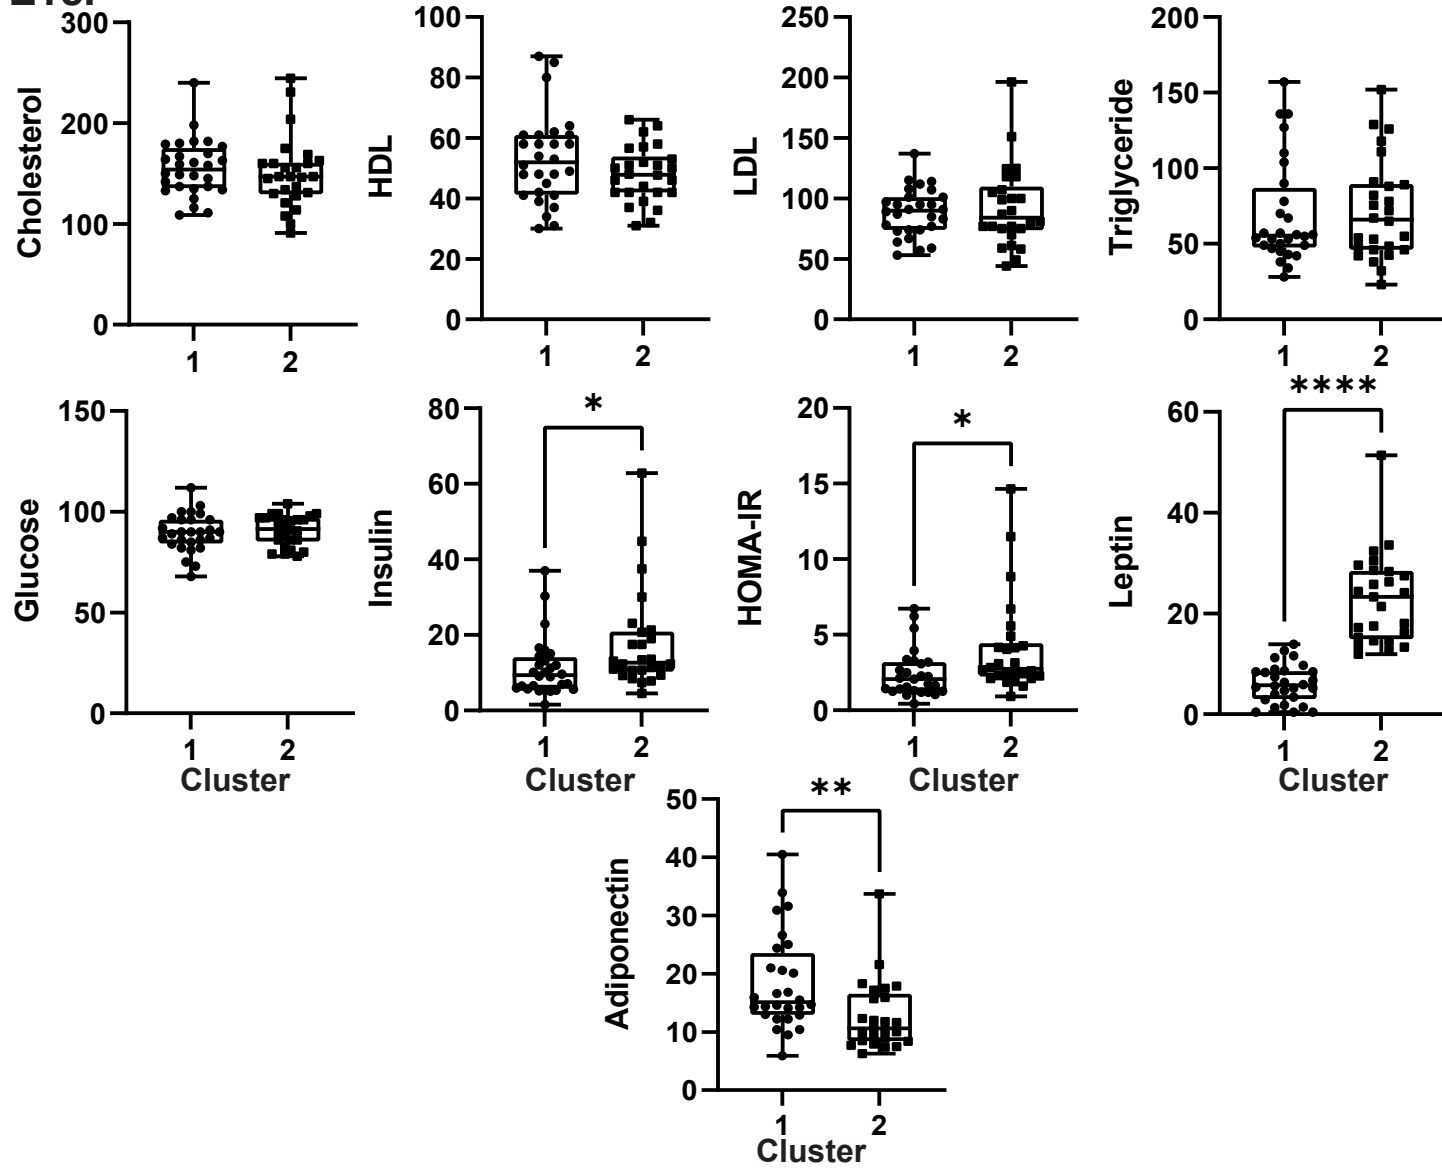

E1d.

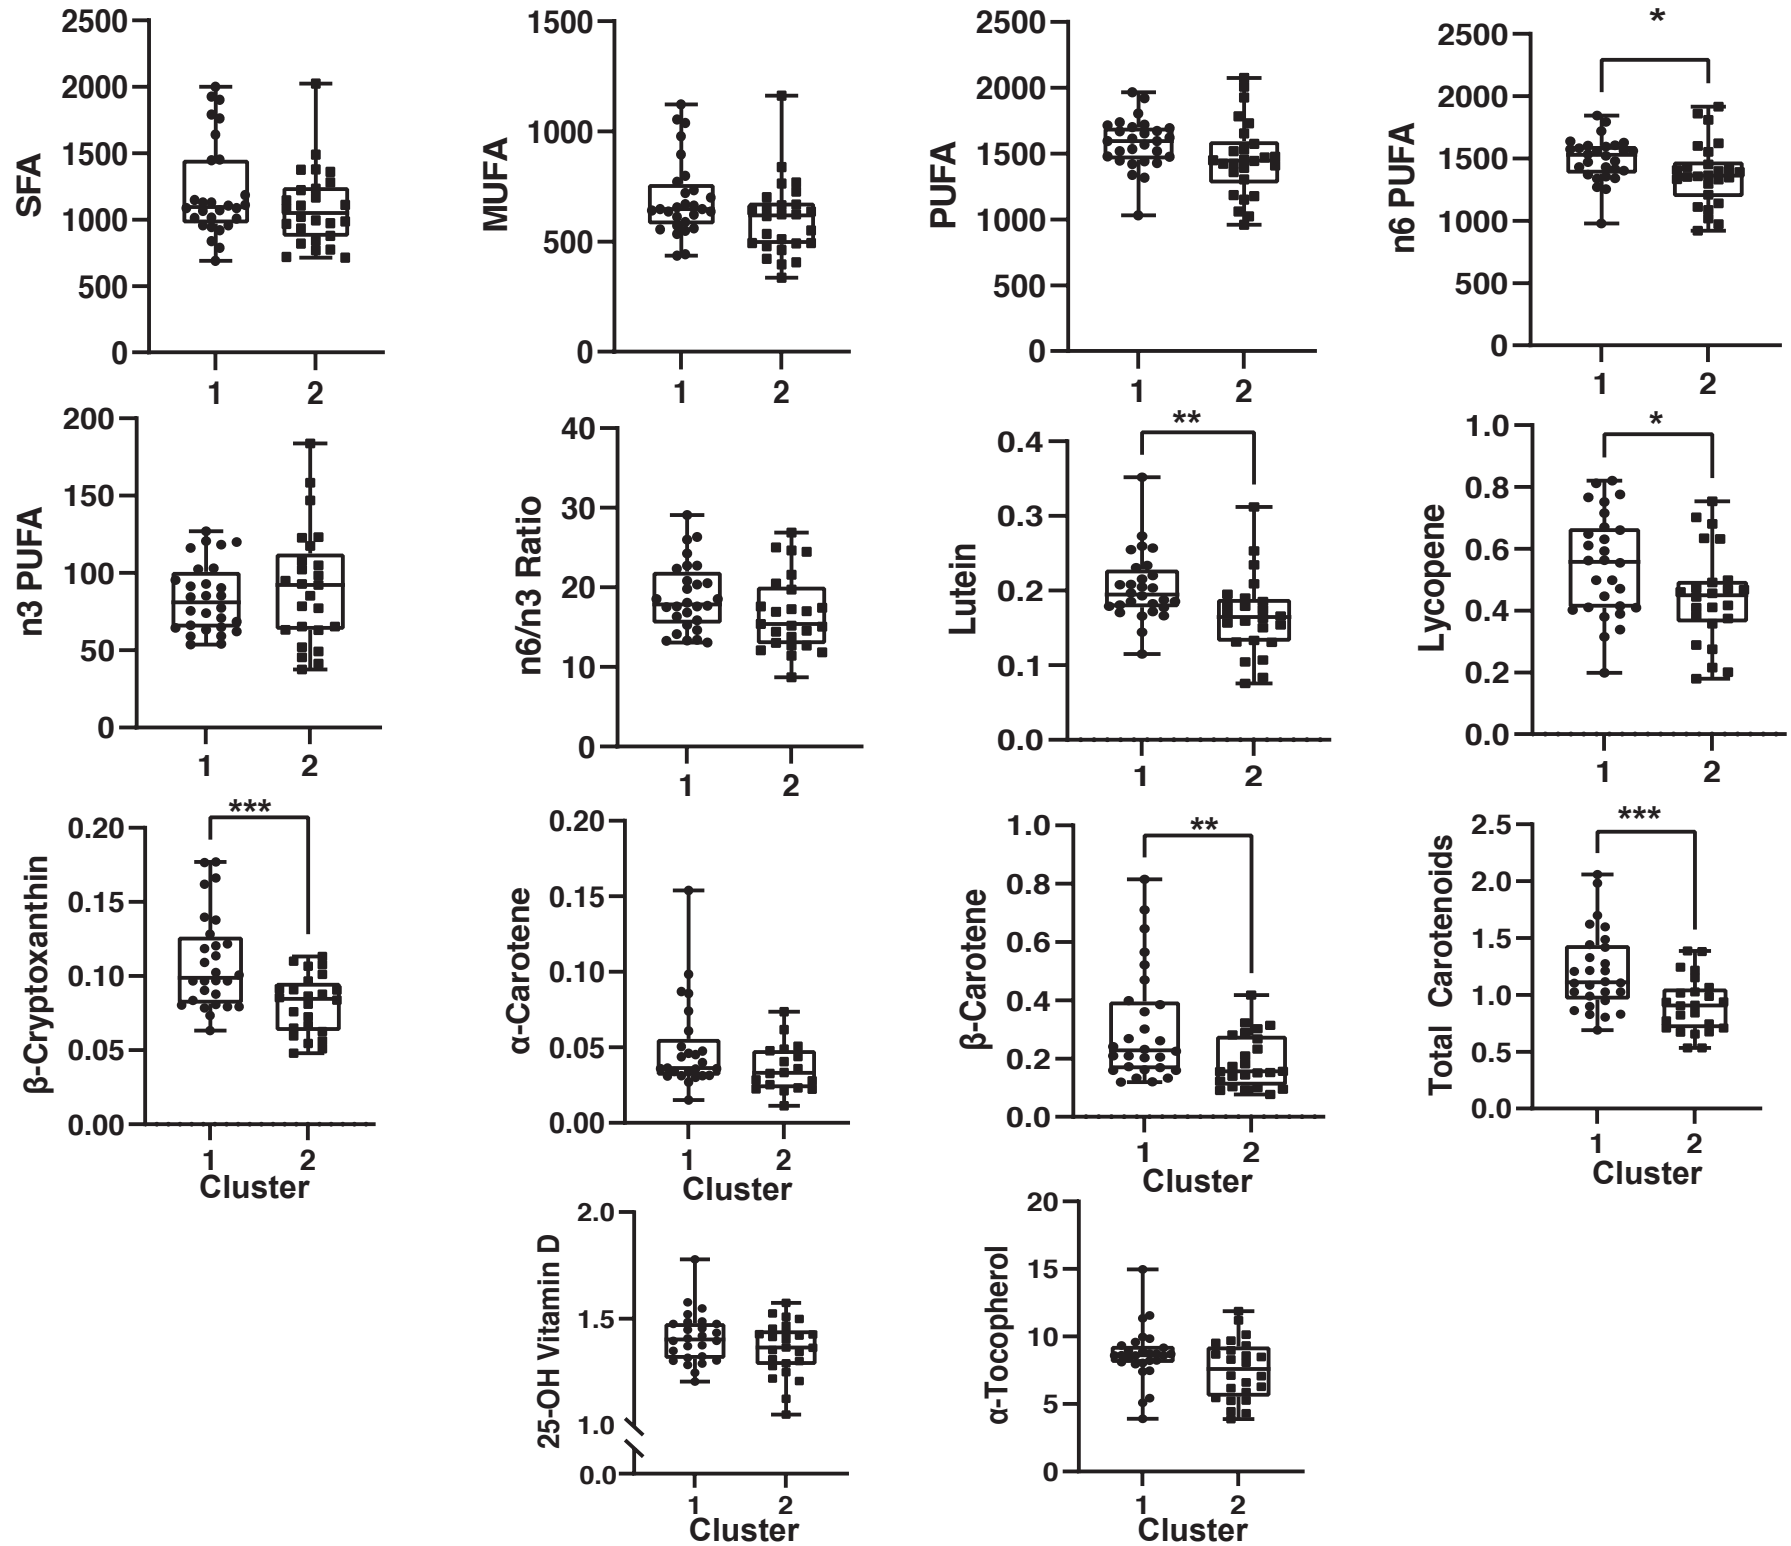

Supplement: NIHMS1816195-supplement-Figure_E1.pdf [file NIHMS1816195-supplement-Figure_E1.pdf]

Fig. E2

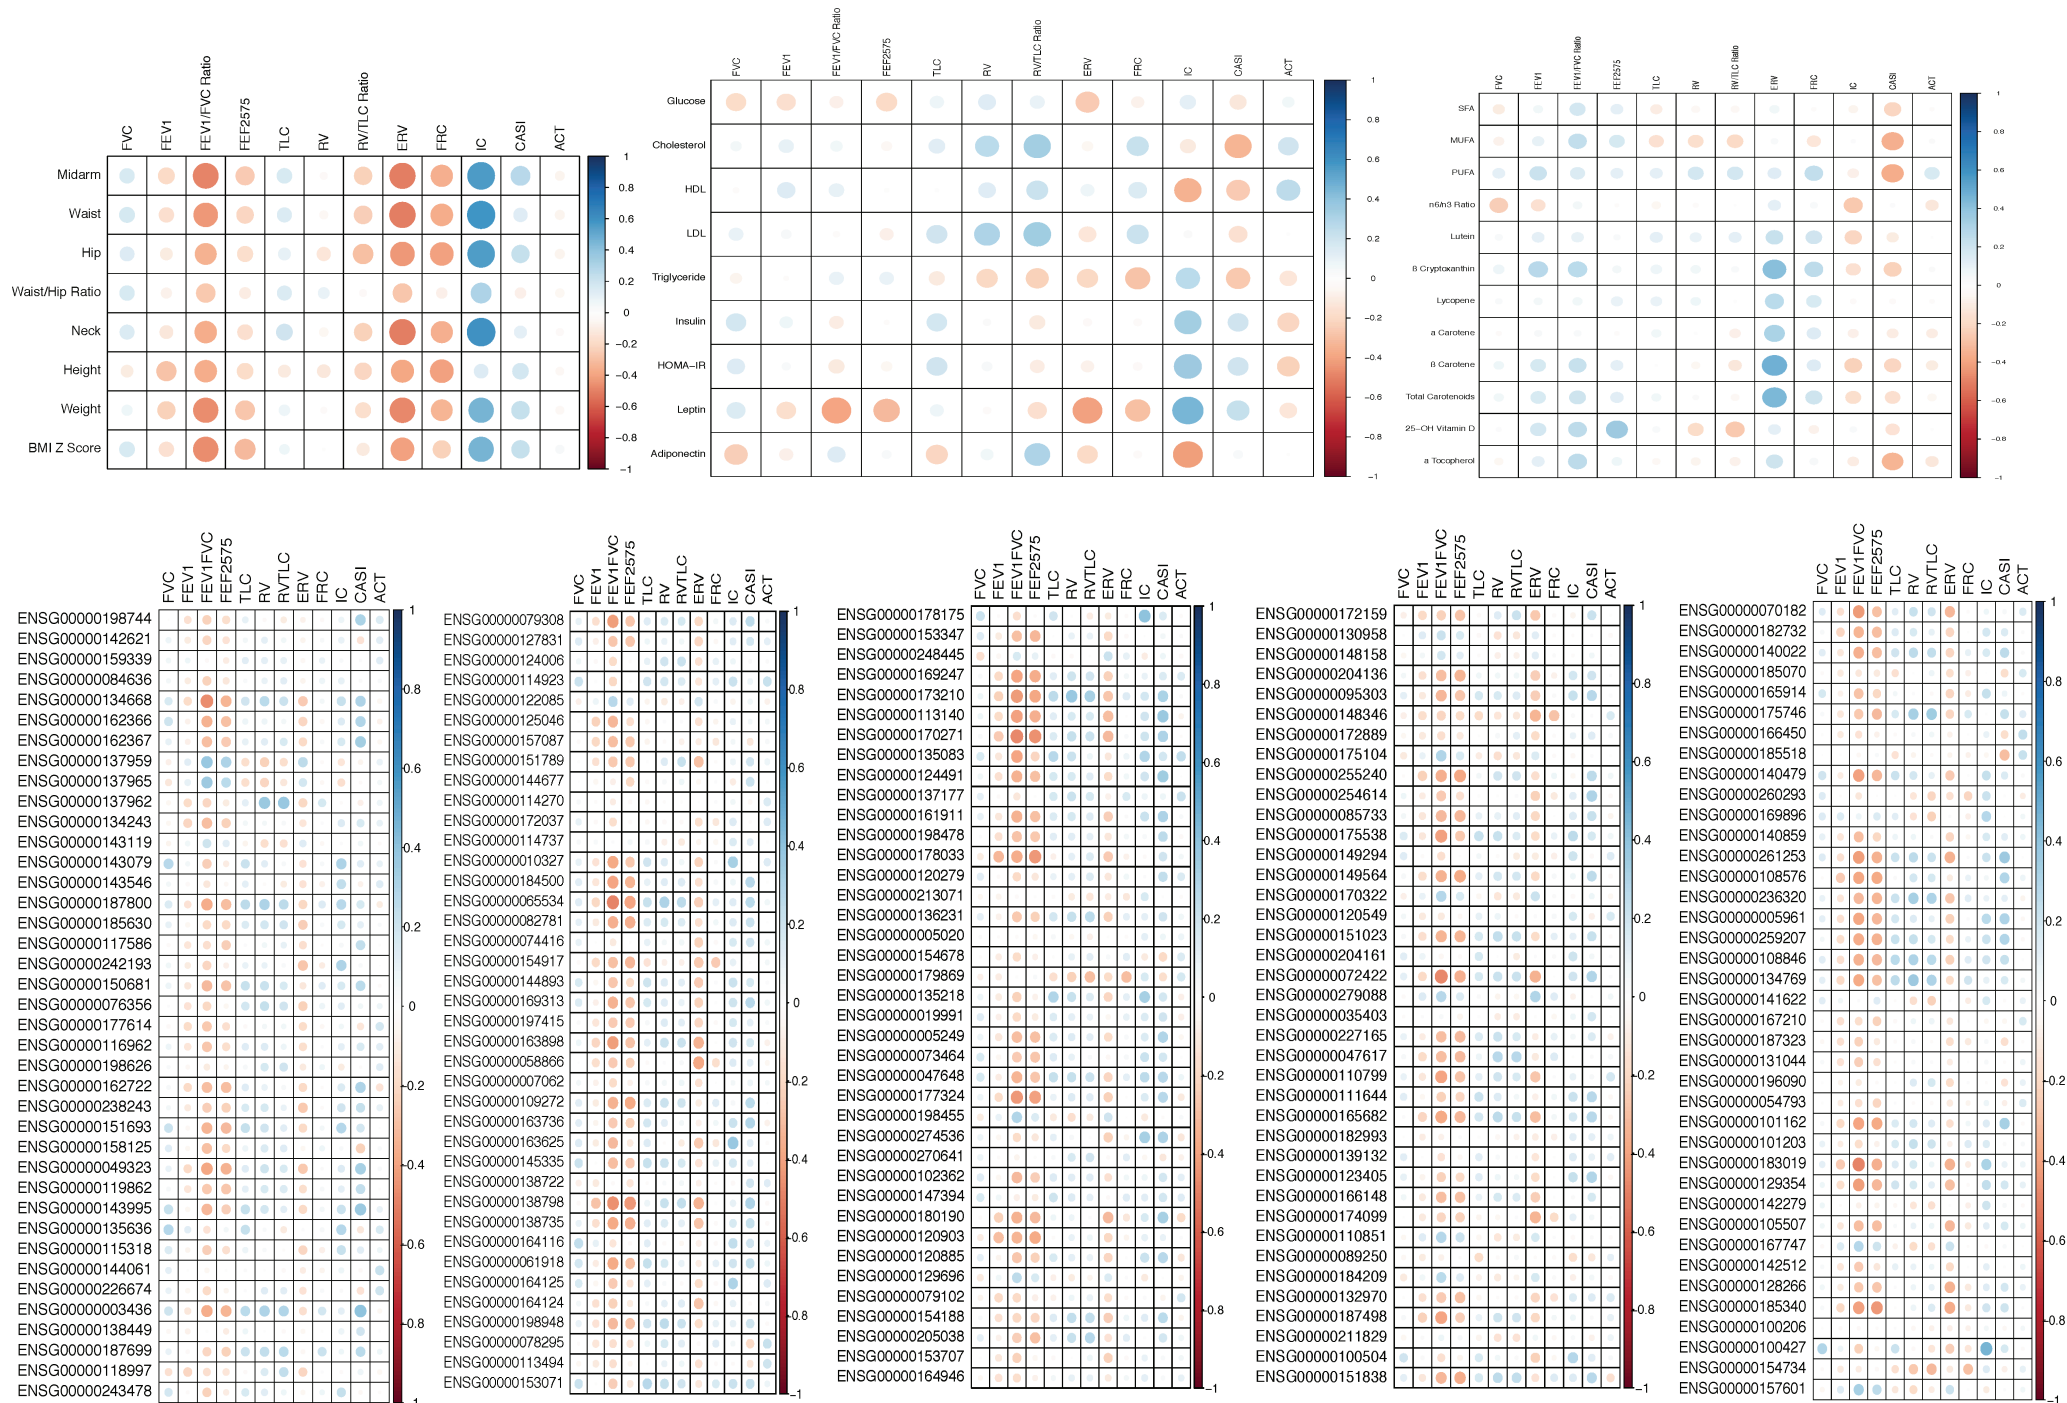

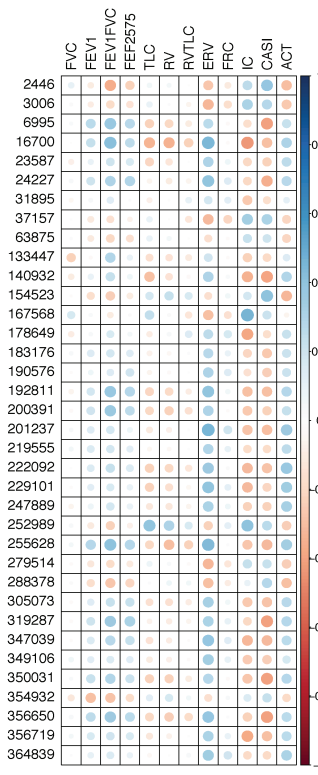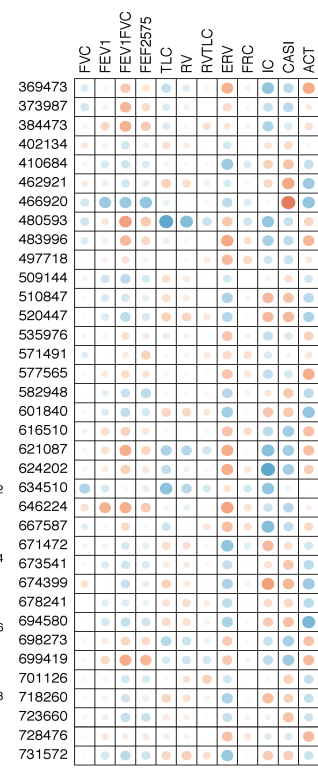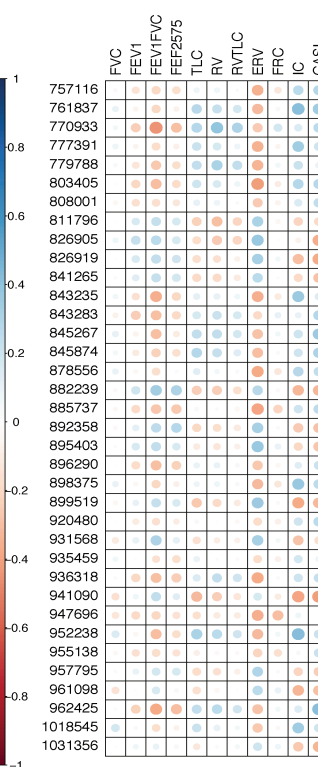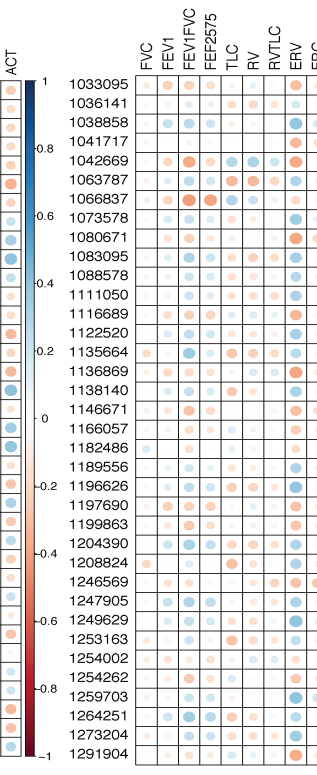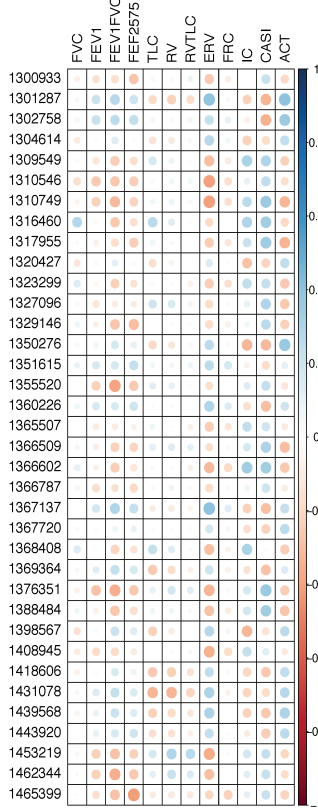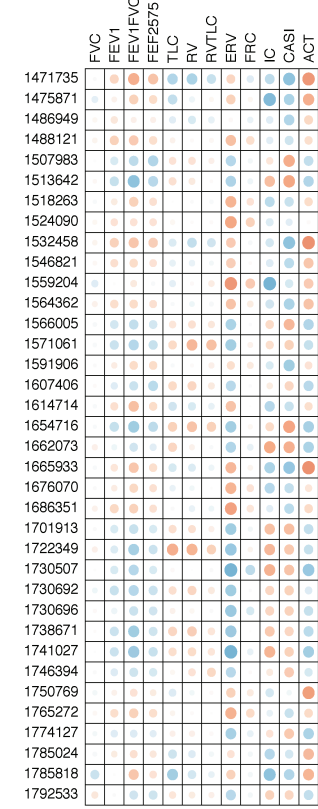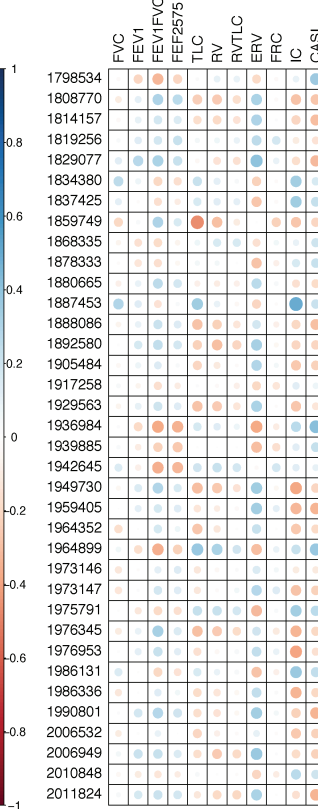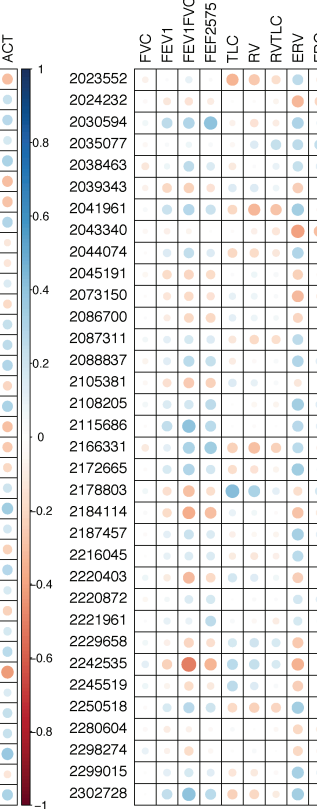

Supplement: NIHMS1816195-supplement-Figure_E2.pdf [file NIHMS1816195-supplement-Figure_E2.pdf]
